1 **Mild and moderate COVID-19 during Alpha, Delta and Omikron pandemic waves in urban**  
2 **Maputo, Mozambique, December 2020-March 2022: a population-based surveillance study**

3 Brecht Ingelbeen<sup>1,2#</sup>, Victória Cumbane<sup>3#</sup>, Ferão Mandlate<sup>3</sup>, Barbara Barbé<sup>1</sup>, Sheila Mercedes  
4 Nhachungue<sup>3</sup>, Nilzio Cavele<sup>3</sup>, Cremildo Manhica<sup>3</sup>, Catildo Cubai<sup>3</sup>, Neusa Maimuna Carlos Nguenha<sup>3</sup>,  
5 Audrey Lacroix<sup>4</sup>, Joachim Mariën<sup>1</sup>, Anja de Weggheleire<sup>5</sup>, Esther van Kleef<sup>1,2</sup>, Philippe Selhorst<sup>1</sup>,  
6 Marianne AB van der Sande<sup>1,2</sup>, Martine Peeters<sup>4</sup>, Marc-Alain Widdowson<sup>1</sup>, Nalia Ismael<sup>3\*</sup>, Ivalda  
7 Macicame<sup>3\*</sup>

8 <sup>1</sup> Instituut voor Tropische Geneeskunde, Antwerp, Belgium

9 <sup>2</sup> Julius Center for Health Sciences and Primary Care, Utrecht University, Utrecht, the Netherlands

10 <sup>3</sup> Instituto Nacional de Saúde, Ministry of Health (MISAU), Marracuene, Mozambique

11 <sup>4</sup> TransVIHMI (Recherches Translationnelles sur VIH et Maladies Infectieuses), Université de  
12 Montpellier, Institut de Recherche pour le Développement, INSERM, Montpellier, France

13 <sup>5</sup> Médecins sans Frontières, Brussels, Belgium

14 Correspondence: [bingelbeen@itg.be](mailto:bingelbeen@itg.be)

15 # and \*: Authors contributed equally

16 **Abstract**

17 In sub-Saharan Africa, reported COVID-19 numbers have been lower than anticipated, even when  
18 considering populations' younger age. The extent to which risk factors, established in industrialised  
19 countries, impact the risk of infection and of disease in populations in sub-Saharan Africa, remains  
20 unclear. We estimated the incidence of mild and moderate COVID-19 in urban Mozambique and analysed  
21 factors associated with infection and disease in a population-based surveillance study.

22 During December 2020-March 2022, households of a population cohort in Polana Caniço, Maputo,  
23 Mozambique, were contacted biweekly. Residents reporting any respiratory sign, anosmia, or ageusia,  
24 were asked to self-administer a nasal swab, for SARS-CoV-2 PCR testing. Of a subset of 1400  
25 participants, dried blood spots were repeatedly collected three-monthly from finger pricks at home.  
26 Antibodies against SARS-CoV-2 spike glycoprotein and nucleocapsid protein were detected using an in-  
27 house developed multiplex antibody assay. We estimated the incidence of respiratory illness and COVID-  
28 19, and SARS-CoV-2 seroprevalence. We used Cox regression models, adjusting for age and sex, to  
29 identify factors associated with first symptomatic COVID-19 and with SARS-CoV-2 sero-conversion in  
30 the first six months.

31 During 11925 household visits in 1561 households, covering 6049 participants (median 21 years, 54.8%  
32 female, 7.3% disclosed HIV positive), 1895.9 person-years were followed up. Per 1000 person-years,  
33 364.5 (95%CI 352.8-376.1) respiratory illness episodes of which 72.2 (95%CI 60.6-83.9) COVID-19  
34 confirmed, were reported. Of 1412 participants, 2185 blood samples were tested (median 30.6 years,  
35 55.2% female). Sero-prevalence rose from 4.8% (95%CI 1.1-8.6%) in December 2020 to 34.7% (95%CI  
36 20.2-49.3%) in June 2021, when 3.0% were vaccinated. Increasing age (strong gradient in hazard ratio,  
37 HR, up to 15.70 in  $\geq 70$  year olds, 95%CI 3.74-65.97), leukaemia, chronic lung disease, hypertension, and  
38 overweight increased risk of COVID-19. We found no increased risk of COVID-19 in people with HIV or  
39 tuberculosis. Risk of COVID-19 was lower among residents in the lowest socio-economic quintile (HR  
40 0.16, 95%CI 0.04-0.64), with no or limited handwashing facilities, and who shared bedrooms (HR 0.42,  
41 95%CI 0.25-0.72). Older age also increased the risk of SARS-CoV-2 seroconversion (HR 1.57 in 60-69  
42 year olds, 95%CI 1.03-2.39). We found no associations between SARS-CoV-2 infection risk and socio-  
43 economic, behavioural factors and comorbidities.

44 Active surveillance in an urban population cohort confirmed frequent COVID-19 underreporting, yet  
45 indicated that the large majority of cases were mild and non-febrile. In contrast to industrialised countries,  
46 deprivation did not increase the risk of infection nor disease.

47 **Keywords:** Population-based surveillance; COVID-19; SARS-CoV-2; Mozambique; Seroepidemiologic  
48 studies; Pandemics

## 49 **Introduction**

50 Older age, deprivation, black ethnicity (compared to white) increased the risk of COVID-19 disease or  
51 death in different contexts (1–3). Younger age groups less frequently manifested symptoms or were  
52 hospitalised when infected, but also had lower infection rates (4,5). In sub-Saharan African countries,  
53 reported COVID-19 cases and deaths were lower than expected from the infection prevalence measured in  
54 sero-surveys and age-specific infection fatality (6,7). HIV increased the risk of COVID-19-related death  
55 (8), as did widely established risk factors as hypertension, diabetes, or chronic kidney or pulmonary  
56 disease (1). Higher COVID-19 incidence among deprived has been explained by inequalities in the ability  
57 to work remotely, and by higher secondary infection rates within (more crowded) households (9).

58 The extent to which non-pharmaceutical interventions had an impact on COVID-19 incidence in sub-  
59 Saharan African settings is still poorly understood. Other studies in Eastern Africa have shown a reduction  
60 in deaths from acute respiratory infections (10).

61 In Mozambique, 184219 COVID-19 cases and 2010 deaths were reported during 2020-21, yet excess  
62 deaths due to the pandemic have been estimated at 78100 (95%CI 54100-109000) (11). The excess  
63 mortality rate (139 per 100000, 95%CI 96-194) was comparable to the global all-age estimate (120 per  
64 100000, 95%CI 113–129). COVID-19 vaccination started on 7 March 2021. By 8 September 2021, 5.0%  
65 of the Mozambican population received at least one dose of vaccine. By 8 March 2022, 40.2% did.

66 In Maputo City, the capital of Mozambique, in 2020-21, COVID-19 testing was centralised in two  
67 COVID-19 management facilities, where mild/moderate cases were unlikely to go. We provide a  
68 comprehensive description of the clinical range of mild and moderate COVID-19 in urban Maputo. We  
69 then estimate SARS-CoV-2 (infection) sero-prevalence, COVID-19 (disease) incidence rates, and analyse  
70 demographics, comorbidities, and exposures increasing the risk of infection and of disease.

## 71 **Methods**

### 72 *Study design and population*

73 Between December 2020 and March 2022, population based surveillance in urban Maputo consisted of  
74 two components: biweekly follow-up of households to record possible COVID-19 cases (acute respiratory  
75 symptom, fever, anosmia, or ageusia) and three-monthly sero-surveys to track SARS-CoV-2 antibodies in  
76 a subset of participants. Recruited households were embedded in the Health and Demographic  
77 Surveillance System of Polana Caniço, covering 15,393 residents. Participants had to be residents since  $\geq 3$   
78 months, and included all ages.

79 At baseline, household-level demographics, socio-economic, water- and sanitation conditions, individual  
80 comorbidities, and behaviour potentially determining exposure were recorded in electronic questionnaires.  
81 Subsequently, households were visited or phoned every two weeks during one year to detect possible  
82 COVID-19 cases at the time of the visit or with symptom onset in the two weeks prior to the visit.  
83 Possible cases were asked to self-administer a nasal swab for SARS-CoV-2 PCR testing. Symptoms  
84 during the previous two weeks were recorded. If COVID-19 was confirmed, the case was followed up  
85 after 28 and 56 days to record clinical outcome.

86 For the repeated sero-survey, randomly selected participating household members from three age strata (0-  
87 17, 18-49, and  $\geq 50$  years) were visited every three months during one year to collect dried blood spots  
88 from a fingerprick and (from 31 March 2021 onwards) record prior COVID-19 vaccination.

### 89 *Laboratory procedures*

90 Nasal swabs were self-administered at participants' homes or assisted by interviewers in participants  
91 under 5 years of age, then transported in RNA Shield™ reagent. Real-time reverse-transcription PCR was  
92 performed within the same day at Instituto Nacional de Saúde, Marracuene, Mozambique.  
93 Dried blood spots, containing 450µl of blood sampled from a fingerprick in six circles (each  
94 approximately 75ul) on dried blood spot filter paper (Whatman 903™ Protein Saver Card), were prepared  
95 for testing by punching two discs of 4mm diameter (corresponding to 40 µl of blood), and eluted  
96 overnight in 160 µL of hypertonic phosphate buffered saline-BSA (dilution 1:40, phosphate buffered  
97 saline-1 % BSA-0.15 % Tween, pH 7.4, Sigma-Aldrich). Before use in the immunoassay, eluted samples  
98 have been further diluted to 1:200 in hypertonic phosphate buffered saline-BSA, according to Mariën *et al*  
99 (12). We then used an in-house developed multiplex antibody assay for the detection of anti-SARS-CoV-2  
100 IgG: we coupled recombinant large spike glycoprotein S1 and S2 subunit, receptor-binding domain  
101 (RBD), and nucleocapsid-protein (NP) antigens derived from SARS-CoV-2 at Sino Biological to  
102 maximum of  $1.25 \times 10^6$  paramagnetic MAGPLEX COOH-microsphere beads from Luminex  
103 Corporation as antibody targets. 150 µl of beads and diluted sera were added to each well, incubated at  
104 room temperature, then washed with 200 µl/well of hypertonic phosphate buffered saline-BSA. Adding  
105 biotin-labelled anti-human secondary IgG and streptavidin-R-phycoerythrin conjugate, another 30 min  
106 incubation, samples were read on Luminex MagPix™ at Instituto Nacional de Saúde, Marracuene,  
107 Mozambique. For each antigen target, a cut-off value of antibody detection was estimated by adding 2.5  
108 standard deviations to the average value of 42 negative control samples from residents of Maputo,  
109 collected prior to the pandemic and also spotted on filter paper. We used two criteria to determine  
110 seropositivity: (i) both RBD and NP above the cut-off, ensuring excellent specificity as demonstrated in  
111 (12), and (ii) RBD above the cut-off, similar to assays used in most other SARS-CoV-2 sero-surveys (5).  
112 After breakdown of the MagPix™ platform, serological testing for samples collected after August 2021  
113 became unavailable.

#### 114 *Data analysis*

115 We estimated incidence rates of acute respiratory illness and of COVID-19 from respectively the number  
116 of possible cases and of confirmed COVID-19 cases, divided by the observation time. Because every  
117 household visit recorded possible cases with onset during two weeks before the visit, observation time  
118 consisted of the two weeks prior to each visit, or the time between visits if less than two weeks spanned  
119 between consecutive visits. We analysed clinical signs and symptoms associated to COVID-19,  
120 comparing confirmed cases to SARS-CoV-2 negative cases, adjusting for age using unconditional logistic  
121 regression.

122 To identify participant demographic, health, socio-economic and behavioural characteristics associated  
123 with COVID-19, we did a survival analysis fitting a Cox proportional hazards model with self-reported  
124 first confirmed COVID-19 as event variable, and observation time, censored after a first confirmed  
125 COVID-19 episode, as time variable, adjusting for age and sex.

126 We estimated infection- and vaccination-induced SARS-CoV-2 sero-prevalence, by age group, based on  
127 sero-survey samples collected up to 31 July 2021. Samples were SARS-CoV-2 sero-positive when  
128 antibodies against RBD and NP were detected, as proposed by a validation study of the assay (12). To  
129 ensure comparability to results with other sero-surveys, we analysed sero-prevalence based on antibodies  
130 against RBD only.

131 To identify participant characteristics associated with SARS-CoV-2 infection (including asymptomatic),  
132 similar to the above survival analysis of first symptomatic COVID-19, we fitted a Cox proportional  
133 hazards model to sero-survey participants with  $\geq 2$  samples collected up to 31 July 2021. Events were  
134 either a SARS-CoV-2 positive result following a negative result (sero-conversion) or an initial SARS-

135 CoV-2 positive result. Time consisted of three months prior to each sero-survey, or the time between  
136 consecutive sero-surveys if less than three months spanned in-between, and was – in case of sero-  
137 conversion – censored at the midpoint between the last negative test and the subsequent positive test.

### 138 *Ethical considerations*

139 The study protocol was approved by the Mozambican national health bio-ethics committee  
140 (517/CNBS/2020) and the Antwerp University Hospital ethics committee (B3002020000123). Study  
141 participants provided written informed consent at baseline for study participation, and again at the time of  
142 collecting a nasal swab or at the first sero-survey visit.

### 143 **Results**

#### 144 *Household surveillance of acute respiratory illness*

145 Between 15 December 2020 and 31 March 2021, we conducted 11925 household visits in 1561  
146 households, covering 6049 participants (Figure 1). Participants were median 21 years old (interquartile  
147 range, IQR, 11-38 years), 3315 (54.8%) were female, and 435 (7.3%) disclosed to be HIV positive. 2694  
148 (55.6% of 4841 with recorded socio-economic status) did not complete primary education and 93 (1.9%)  
149 had higher education.

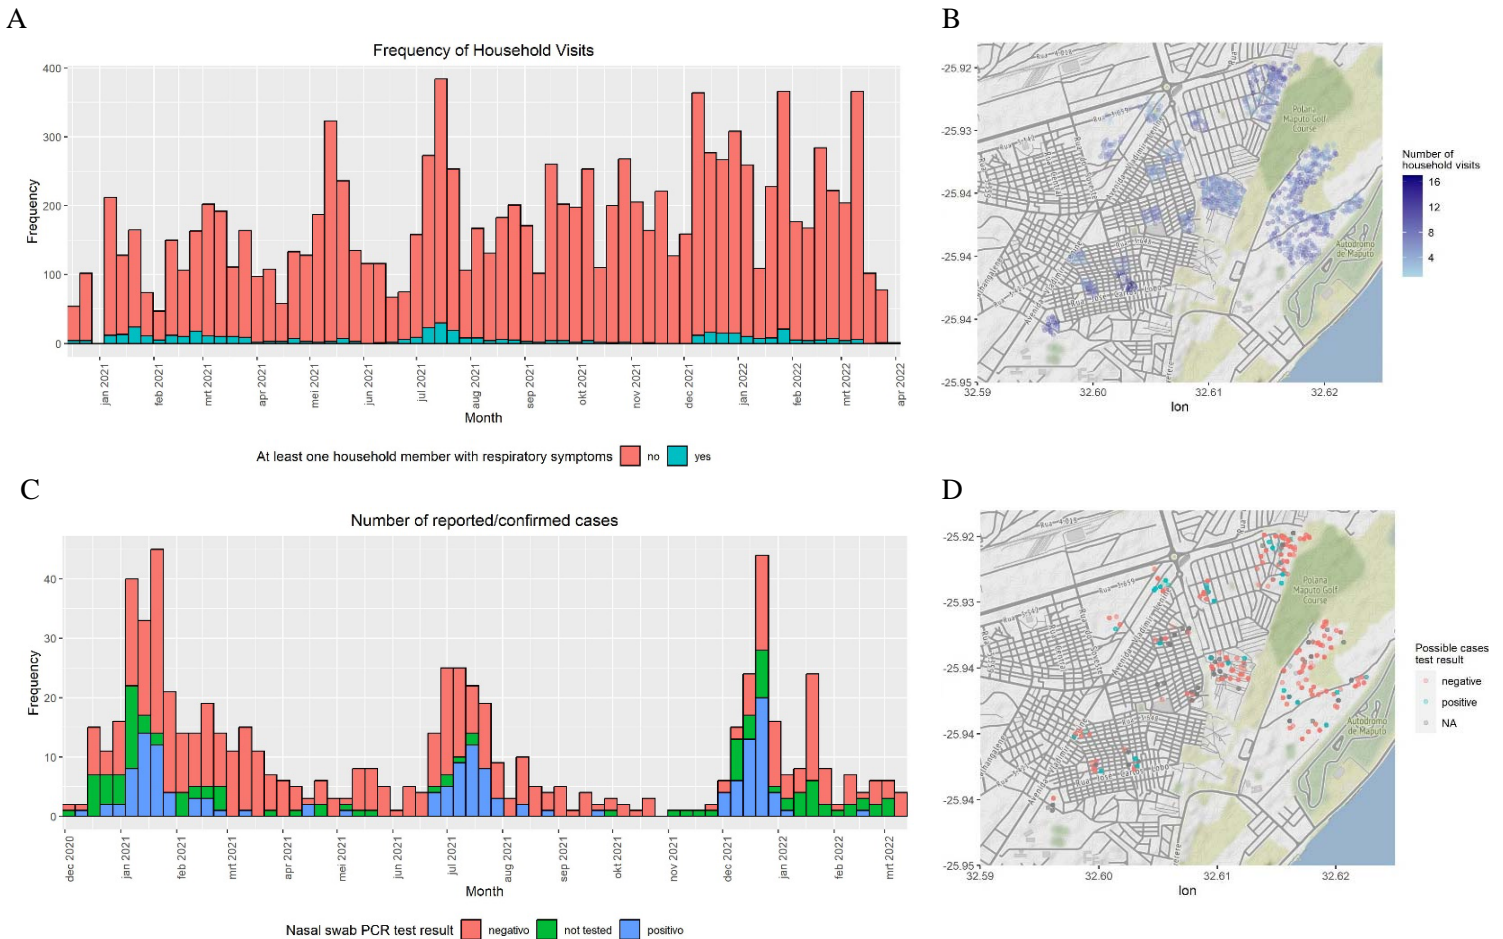

150 *Figure 1. Household acute respiratory illness and COVID-19 surveillance. A. Weekly frequency of household visits,*  
151 *B. Geographical distribution of household visits in Maputo City, C. Weekly number of possible COVID-19 cases,*  
152 *stacked by SARS-CoV-2 PCR test result, D. Geographical distribution of possible COVID-19 cases by result.*

153

154 *Respiratory illness and COVID-19 incidence rate*

155 In the two weeks prior to the visits, 482 households reported at least one possible case in the household.  
 156 The incidence rate of respiratory illness was 364.5 (95% CI 352.8-376.1) per 1000 person-years (py, 691  
 157 possible cases in 611 participants; 1895.9 py followed up). Of 579 possible cases, a nasal swab was  
 158 collected and tested, median 5 days (IQR, 3-8 days) after symptom onset. SARS-CoV-2 was confirmed in  
 159 144 (24.9%) cases. The incidence rate of confirmed COVID-19 was 72.2 (95% CI 60.6-83.9) per 1000 py.  
 160 Among participants under 18 years old, this was 25.9 (95%CI 15.0-36.8) per 1000 py; in 18-49 year olds  
 161 it was 79.9 (95%CI 61.2-98.5) per 1000 py; in ≥50 year olds, it was 188.3 (95%CI 141.8-234.9) per 1000  
 162 py. SARS-CoV-2 positivity of tested possible cases peaked at 39% in January 2021, at 39% in July 2021,  
 163 and at 55% in December 2021.

164 *Clinical signs and symptoms of mild and moderate COVID-19*

165 Reported COVID-19 cases were median 36.4 years old (IQR 22.3-57.5 years) and 87 (60.4%) were female  
 166 (Table 1). Compared to SARS-CoV-2 negative cases (median age 26.0 years, IQR 10.8-49.3, 55.8%  
 167 female), COVID-19 cases had more frequently anosmia (age-adjusted odds ratio, aOR 2.36 95%CI 1.48-  
 168 3.58), ageusia (aOR, 2.29 95%CI 1.45-3.58), loss of appetite (aOR 2.21 95%CI 1.37-3.56), and chills  
 169 (aOR 1.78 95%CI 1.05-2.97). During the Omikron variant wave starting December 2021, the association  
 170 with each of these symptoms disappeared (anosmia aOR 1.1 95%CI 0.46-2.56, ageusia 0.70 95%CI 2.29-  
 171 1.62, loss of appetite 1.25 95%CI 0.52-2.96, chills 0.88 95%CI 0.28-2.49).

172 *Table 1. Clinical signs and symptoms associated with SARS-CoV-2 confirmation among acute respiratory illness*  
 173 *(possible COVID-19 cases) reported during December 2020-March 2022.*

| Factors                 | Confirmed SARS-CoV-2 (N=148) |      | Negative SARS-CoV-2 (N=435) |      | Crude odds ratio |                  | Age-adjusted odds ratio |                  |
|-------------------------|------------------------------|------|-----------------------------|------|------------------|------------------|-------------------------|------------------|
|                         | n                            | %    | n                           | %    | OR               | 95%CI            | aOR                     | 95% CI           |
| Age*: 0-9 years         | 7                            | 4.9  | 90                          | 21.5 | ref              |                  |                         |                  |
| 10-19 years             | 18                           | 12.5 | 79                          | 18.9 | <b>2.93</b>      | <b>1.21-7.87</b> |                         |                  |
| 20-29 years             | 34                           | 23.6 | 62                          | 14.8 | <b>7.05</b>      | <b>3.10-18.3</b> |                         |                  |
| 30-39 years             | 18                           | 12.5 | 48                          | 11.5 | <b>4.82</b>      | <b>1.95-13.2</b> |                         |                  |
| 40-49 years             | 14                           | 9.7  | 37                          | 8.8  | <b>4.86</b>      | <b>1.87-13.8</b> |                         |                  |
| 50-59 years             | 24                           | 16.7 | 46                          | 11.0 | <b>6.71</b>      | <b>2.82-17.9</b> |                         |                  |
| 60-69 years             | 22                           | 15.3 | 40                          | 9.5  | <b>7.07</b>      | <b>2.92-19.1</b> |                         |                  |
| 70+ years               | 7                            | 4.9  | 17                          | 4.1  | <b>5.29</b>      | <b>1.62-17.4</b> |                         |                  |
| Sex*: Female            | 87                           | 60.4 | 234                         | 55.8 | 1.21             | 0.82-1.78        | 1.19                    | 0.81-1.77        |
| Clinical signs/symptoms |                              |      |                             |      |                  |                  |                         |                  |
| Cough                   | 117                          | 89.3 | 326                         | 86.0 | 1.36             | 0.75-2.63        | 1.52                    | 0.82-2.95        |
| Headache                | 81                           | 61.8 | 217                         | 57.3 | 1.21             | 0.81-1.82        | 1.14                    | 0.75-1.73        |
| Rhinorrhoea             | 69                           | 52.7 | 221                         | 58.3 | 0.80             | 0.53-1.19        | 0.86                    | 0.57-1.29        |
| Throat pain             | 54                           | 41.2 | 131                         | 34.6 | 1.33             | 0.88-1.99        | 1.22                    | 0.80-1.84        |
| Ageusia                 | 47                           | 35.9 | 69                          | 18.2 | <b>2.51</b>      | <b>1.61-3.91</b> | <b>2.29</b>             | <b>1.45-3.58</b> |
| Oxygen saturation <95%  | 16/48                        | 33.3 | 36/151                      | 23.8 | 1.60             | 0.78-3.22        | 1.54                    | 0.74-3.14        |
| Anosmia                 | 43                           | 32.8 | 63                          | 16.6 | <b>2.45</b>      | <b>1.55-3.85</b> | <b>2.36</b>             | <b>1.48-3.75</b> |
| Fatigue                 | 41                           | 31.3 | 95                          | 25.1 | 1.36             | 0.88-2.10        | 1.26                    | 0.80-1.96        |
| Loss of appetite        | 39                           | 29.8 | 62                          | 16.4 | <b>2.19</b>      | <b>1.37-3.48</b> | <b>2.21</b>             | <b>1.37-3.56</b> |
| Fever                   | 33                           | 25.2 | 96                          | 25.3 | 0.99             | 0.62-1.56        | 1.10                    | 0.68-1.75        |
| Chills                  | 29                           | 22.1 | 50                          | 13.2 | <b>1.87</b>      | <b>1.12-3.10</b> | <b>1.78</b>             | <b>1.05-2.97</b> |
| Joint pain              | 29                           | 22.1 | 49                          | 12.9 | <b>1.91</b>      | <b>1.14-3.17</b> | 1.59                    | 0.90-2.59        |
| Chest pain              | 25                           | 19.1 | 60                          | 15.8 | 1.25             | 0.74-2.08        | 1.10                    | 0.64-1.85        |
| Myalgia                 | 24                           | 18.3 | 49                          | 12.9 | 1.51             | 0.87-2.56        | 1.24                    | 0.70-2.13        |
| Nausea                  | 10                           | 7.6  | 23                          | 6.1  | 1.28             | 0.57-2.69        | 1.29                    | 0.57-2.77        |
| Dyspnoe                 | 9                            | 6.9  | 36                          | 9.5  | 0.70             | 0.31-1.44        | 0.62                    | 0.27-1.31        |
| Diarrhoea               | 8                            | 6.1  | 26                          | 6.9  | 0.88             | 0.37-1.92        | 0.86                    | 0.35-1.89        |
| Vomit                   | 7                            | 5.3  | 19                          | 5.0  | 1.07             | 0.41-2.50        | 1.32                    | 0.49-3.23        |
| Rash                    | 3                            | 2.3  | 3                           | 0.8  | 2.94             | 0.54-16.0        | 2.98                    | 0.54-16.4        |
| Nose bleeding           | 1                            | 0.8  | 3                           | 0.8  | 0.95             | 0.05-7.5         | 0.99                    | 0.05-7.94        |
| Change of consciousness | 0                            | 0.0  | 3                           | 0.8  |                  |                  |                         |                  |

174 \* age and sex missing of 16 possible cases, clinical signs and symptoms missing of 69 possible cases.

175 Of 92 confirmed COVID-19 cases followed up after 28 days, of whom 54 again after 56 days, one (1.1%)  
 176 died.

177 *Characteristics associated with (symptomatic) COVID-19*

178 Increasing age (in  $\geq 70$  year olds hazard ratio (HR) 15.70, 95%CI 3.74-65.97) and several reported  
 179 comorbidities increased the risk of symptomatic COVID-19: leukaemia, chronic lung disease, overweight,  
 180 underweight, diabetes, chronic heart disease, and hypertension (Table 2). We found no increased risk of  
 181 COVID-19 in people with HIV (HR 0.80, 95%CI 0.37-1.76) or with (a history of) tuberculosis (HR 0.93,  
 182 95%CI 0.33-2.58). The risk of COVID-19 was lower in people belonging to the lowest socio-economic  
 183 quintile (HR 0.16, 95%CI 0.04-0.64), in households with no or limited handwashing facilities, and in  
 184 households where bedrooms were shared with 3 or more household members (HR 0.42, 95%CI 0.25-  
 185 0.72).

186 *Table 2. Demographic, socio-economic and behavioural characteristics associated with first confirmed COVID-19*  
 187 *among among acute respiratory illness (possible COVID-19 cases) reported in population-based surveillance during*  
 188 *December 2020-March 2022, using a Cox regression model adjusting for age and sex.*

| Characteristic                       |                                      | Cohort participants |      | Reported first COVID-19 |      | COVID-19 age-/sex-adjusted hazard ratio |                    |           |
|--------------------------------------|--------------------------------------|---------------------|------|-------------------------|------|-----------------------------------------|--------------------|-----------|
|                                      |                                      | N                   | %    | N                       | %    | HR                                      | 95%CI              |           |
| Age                                  | 0-9 years                            | 1331                | 22.0 | 7                       | 5.1  | ref                                     |                    |           |
|                                      | 10-19                                | 1570                | 26.0 | 18                      | 13.1 | 2.63                                    | 0.72-9.56          |           |
|                                      | 20-29                                | 1128                | 18.6 | 30                      | 21.9 | <b>9.00</b>                             | <b>2.72-29.84</b>  |           |
|                                      | 30-39                                | 644                 | 10.6 | 17                      | 12.4 | <b>4.17</b>                             | <b>1.04-16.68</b>  |           |
|                                      | 40-49                                | 519                 | 8.6  | 14                      | 10.2 | <b>6.42</b>                             | <b>1.70-24.21</b>  |           |
|                                      | 50-59                                | 406                 | 6.7  | 24                      | 17.5 | <b>9.94</b>                             | <b>2.73-36.11</b>  |           |
|                                      | 60-69                                | 318                 | 5.3  | 20                      | 14.6 | <b>14.33</b>                            | <b>4.04-50.82</b>  |           |
|                                      | $\geq 70$                            | 133                 | 2.2  | 7                       | 5.1  | <b>15.70</b>                            | <b>3.74-65.97</b>  |           |
| Sex                                  | Male                                 | 2804                | 46.4 | 55                      | 40.1 | ref                                     |                    |           |
|                                      | Female                               | 3245                | 53.6 | 82                      | 59.9 | 1.10                                    | 0.70-1.72          |           |
| Socio-economic quintile              | Lowest (compared to other quintiles) | 836                 | 16.3 | 6                       | 4.9  | <b>0.16</b>                             | <b>0.04-0.64</b>   |           |
|                                      | 1. lowest                            | 836                 | 16.3 | 6                       | 4.9  | 0.25                                    | 0.06-1.15          |           |
|                                      | 2. low                               | 1015                | 19.8 | 27                      | 22.1 | 1.82                                    | 0.86-3.87          |           |
|                                      | 3. med.                              | 1063                | 20.7 | 15                      | 12.3 | ref                                     |                    |           |
|                                      | 4. med./high                         | 1078                | 21.0 | 31                      | 25.4 | 1.71                                    | 0.81-3.63          |           |
|                                      | 5. highest                           | 1132                | 22.1 | 43                      | 35.2 | 1.95                                    | 0.95-3.98          |           |
| Education                            | None                                 | 88                  | 1.9  | 3                       | 2.4  | <b>0.50</b>                             | <b>0.30-0.82</b>   |           |
|                                      | Primary                              | 2646                | 55.8 | 59                      | 46.8 | ref                                     |                    |           |
|                                      | Secondary                            | 1735                | 36.6 | 56                      | 44.4 | 1.07                                    | 0.45-2.53          |           |
|                                      | Higher                               | 277                 | 5.8  | 8                       | 6.3  | 0.95                                    | 0.23-3.99          |           |
| Health worker Reported comorbidities | HIV                                  | 196                 | 3.2  | 4                       | 5.1  | 1.39                                    | 0.51-3.81          |           |
|                                      | (history of) tuberculosis            | 434                 | 7.3  | 7                       | 8.9  | 0.79                                    | 0.36-1.74          |           |
|                                      | hypertension                         | 178                 | 3.0  | 4                       | 5.1  | 0.99                                    | 0.36-2.74          |           |
|                                      | diabetes                             | 575                 | 9.6  | 22                      | 27.8 | <b>1.86</b>                             | <b>1.02-3.38</b>   |           |
|                                      | asthma                               | 68                  | 1.1  | 3                       | 3.8  | 2.14                                    | 0.66-6.95          |           |
|                                      | chronic lung disease                 | 291                 | 4.9  | 4                       | 5.1  | 1.11                                    | 0.41-3.04          |           |
|                                      | chronic heart disease                | 37                  | 0.6  | 4                       | 5.1  | <b>9.69</b>                             | <b>3.51-26.76</b>  |           |
|                                      | leukaemia                            | 51                  | 0.9  | 2                       | 2.5  | 2.11                                    | 0.51-8.68          |           |
|                                      |                                      | 51                  | 0.9  | 2                       | 2.5  | <b>28.53</b>                            | <b>3.92-207.62</b> |           |
|                                      | BMI*                                 | underweight         | 817  | 38.2                    | 12   | 15.8                                    | 1.45               | 0.68-3.13 |
|                                      |                                      | normal              | 802  | 37.5                    | 27   | 35.5                                    | ref                |           |
|                                      | overweight                           | 281                 | 13.1 | 19                      | 25.0 | <b>1.87</b>                             | <b>1.02-3.44</b>   |           |
|                                      | obesity                              | 237                 | 11.1 | 18                      | 23.7 | <b>2.09</b>                             | <b>1.08-4.06</b>   |           |
| Smoking                              | non smoker                           | 5738                | 95.8 | 74                      | 93.7 | ref                                     |                    |           |
|                                      | (ex-)smoker                          | 251                 | 4.2  | 5                       | 6.3  | 1.09                                    | 0.42-2.78          |           |
| Public transportation                | none                                 | 3948                | 66.0 | 39                      | 49.4 | ref                                     |                    |           |
|                                      | bus/train                            | 2013                | 33.7 | 40                      | 50.6 | 1.50                                    | 0.95-2.35          |           |

|                                     |                       |      |      |    |      |             |                  |
|-------------------------------------|-----------------------|------|------|----|------|-------------|------------------|
|                                     | moto taxi/shared taxi | 19   | 0.3  | 0  | 0.0  |             |                  |
| Sharing bedroom                     | 1-2 pers.             | 3311 | 55.6 | 61 | 77.2 | ref         |                  |
|                                     | 3 or more pers.       | 2646 | 44.4 | 18 | 22.8 | <b>0.42</b> | <b>0.25-0.72</b> |
| Sharing toilet with other household |                       | 896  | 15.0 | 15 | 19.0 | 1.40        | 0.80-2.46        |
| Handwash facility                   | sink/faucet           | 1748 | 29.3 | 35 | 44.3 | ref         |                  |
|                                     | bucket/jar/kettle     | 1204 | 20.2 | 9  | 11.4 | <b>0.38</b> | <b>0.18-0.79</b> |
| Water available in house            | none                  | 3005 | 50.4 | 35 | 44.3 | <b>0.54</b> | <b>0.34-0.87</b> |
|                                     | yes                   | 2153 | 36.1 | 35 | 44.3 | ref         |                  |
|                                     | no                    | 3804 | 63.9 | 44 | 55.7 | 0.74        | 0.48-1.16        |

189 \*in  $\geq 16$  year olds

190 *Infection-induced SARS-CoV-2 sero-prevalence*

191 2185 samples collected until 31 July 2021 of 1412 sero-survey participants (median age 30.6 years, IQR  
192 13.7-57.6; 38.2%  $\geq 50$  years old; 55.2% female) were tested. 301 participants (21.3%) tested positive  
193 (antibodies against RBD and NP) at least once. 34 (45.3%) out of 75 with a test subsequent to positive  
194 test, seroreverted.

195 Crude sero-prevalence increased from 4.8% (95%CI 1.1-8.6) in December 2020 to 34.2% (95%CI 23.4-  
196 45.1) in June 2021, when 2.7% of participants were vaccinated with at least one dose of vaccine (Figure  
197 2). Sero-prevalence increased strongest in  $\geq 50$  year olds, peaking at 51.6% (95%CI 34.0-69.2) in June  
198 2021, when 3.2% was vaccinated, yet declined to 41.6% (95%CI 26.5-56.7) in July 2021 when 10.9% was  
199 vaccinated.

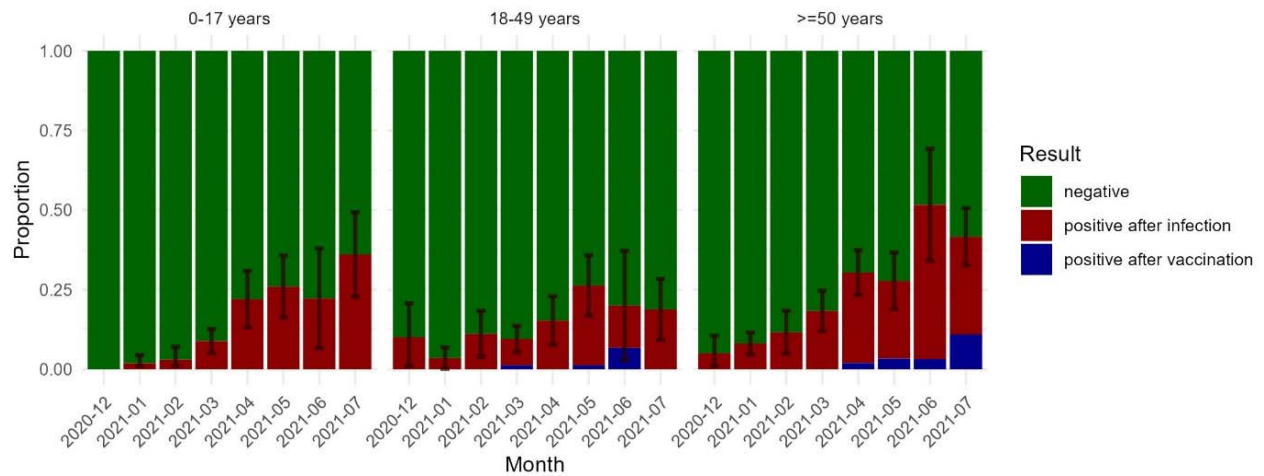

200 *Figure 2. Infection- and vaccine-induced SARS-CoV-2 sero-prevalence by age group, December 2020 - July 2021.*  
201  $N_{0-17\text{ years}}=647$ ,  $N_{18-49\text{ years}}=612$ ,  $N_{\geq 50\text{ years}}=882$ .

203 Crude sero-prevalence based on antibodies against RBD only was higher, rising from 10.5% (95%CI 5.1-  
204 15.9%) in December 2020 to 46.5% (95%CI 36.7-56.3) in July 2021, without decrease in sero-prevalence  
205 from June to July 2021 (Supplementary table in Appendix).

206 *Characteristics associated with SARS-CoV-2 infection*

207 Older age increased the risk of SARS-CoV-2 infection (HR 60-69 versus 0-9 years 1.57, 95%CI 1.03-  
208 2.39, Table 3). We found no association between SARS-CoV-2 infection risk and socio-economic,  
209 behavioural factors and comorbidities.

210



211 *Table 3. Demographic, socio-economic and behavioural characteristics associated with SARS-CoV-2 infection*  
 212 *(including asymptomatic) among sero-survey participants with  $\geq 2$  samples tested during December 2020-July 2021,*  
 213 *using a Cox regression model adjusting for age and sex.*

| Characteristic                       |                                      | Sero-survey participants |      | SARS-CoV-2 infected |      | SARS-CoV-2 age-/sex-adjusted hazard ratio |                  |
|--------------------------------------|--------------------------------------|--------------------------|------|---------------------|------|-------------------------------------------|------------------|
|                                      |                                      | N                        | %    | N                   | %    | HR                                        | 95%CI            |
| Age                                  | 0-9 years                            | 223                      | 15.9 | 35                  | 12.2 | ref                                       |                  |
|                                      | 10-19                                | 305                      | 21.7 | 58                  | 20.2 | 1.11                                      | 0.73-1.69        |
|                                      | 20-29                                | 161                      | 11.5 | 28                  | 9.8  | 0.93                                      | 0.56-1.53        |
|                                      | 30-39                                | 114                      | 8.1  | 14                  | 4.9  | 0.82                                      | 0.44-1.53        |
|                                      | 40-49                                | 68                       | 4.8  | 15                  | 5.2  | 1.11                                      | 0.61-2.04        |
|                                      | 50-59                                | 240                      | 17.1 | 54                  | 18.8 | 1.32                                      | 0.86-2.03        |
|                                      | 60-69                                | 202                      | 14.4 | 57                  | 19.9 | <b>1.57</b>                               | <b>1.03-2.39</b> |
|                                      | $\geq 70$                            | 93                       | 6.6  | 26                  | 9.1  | 1.20                                      | 0.72-2.00        |
| Sex                                  | Male                                 | 630                      | 44.8 | 128                 | 44.6 | ref                                       |                  |
|                                      | Female                               | 776                      | 55.2 | 159                 | 55.4 | 0.94                                      | 0.74-1.18        |
| Socio-economic quintile              | Lowest (compared to other quintiles) | 190                      | 15.7 | 34                  | 13.9 | 0.83                                      | 0.58-1.20        |
|                                      | 1. lowest                            | 190                      | 15.7 | 34                  | 13.9 | 0.71                                      | 0.46-1.09        |
|                                      | 2. low                               | 210                      | 17.4 | 44                  | 18.0 | 1.00                                      | 0.67-1.49        |
|                                      | 3. med.                              | 234                      | 19.4 | 54                  | 22.0 | ref                                       |                  |
|                                      | 4. med./high                         | 259                      | 21.4 | 46                  | 18.8 | 0.69                                      | 0.46-1.02        |
|                                      | 5. highest                           | 316                      | 26.1 | 67                  | 27.3 | 0.80                                      | 0.56-1.15        |
| Education                            | None                                 | 738                      | 62.5 | 168                 | 67.5 | 1.26                                      | 0.94-1.70        |
|                                      | Primary                              | 356                      | 30.2 | 62                  | 24.9 | ref                                       |                  |
|                                      | Secondary                            | 63                       | 5.3  | 14                  | 5.6  | 1.25                                      | 0.70-2.23        |
|                                      | Higher                               | 23                       | 1.9  | 5                   | 2.0  | 1.29                                      | 0.52-3.23        |
| Health worker Reported comorbidities | HIV                                  | 118                      | 12   | 20                  | 10.9 | 0.82                                      | 0.51-1.32        |
|                                      | (history of) tuberculosis            | 47                       | 4.8  | 7                   | 3.8  | 0.87                                      | 0.40-1.86        |
|                                      | hypertension                         | 209                      | 21.2 | 49                  | 26.8 | 0.91                                      | 0.61-1.36        |
|                                      | diabetes                             | 27                       | 2.7  | 11                  | 6    | 1.65                                      | 0.88-3.11        |
|                                      | asthma                               | 59                       | 6.0  | 14                  | 7.7  | 1.23                                      | 0.71-2.12        |
|                                      | chronic lung disease                 | 6                        | 0.6  | 2                   | 1.1  | 2.48                                      | 0.61-10.09       |
|                                      | chronic heart disease                | 12                       | 1.2  | 1                   | 0.5  | 0.40                                      | 0.06-2.87        |
|                                      | leukaemia                            | 1                        | 0.1  | 1                   | 0.5  | 1.27                                      | 0.17-9.24        |
|                                      |                                      |                          |      |                     |      |                                           |                  |
| BMI*                                 | underweight                          | 258                      | 29.5 | 52                  | 26.8 | 0.72                                      | 0.35-1.46        |
|                                      | normal                               | 352                      | 40.3 | 69                  | 35.6 | ref                                       |                  |
|                                      | overweight                           | 126                      | 14.4 | 30                  | 15.5 | 1.08                                      | 0.69-1.70        |
|                                      | obesity                              | 138                      | 15.8 | 43                  | 22.2 | 1.25                                      | 0.81-1.93        |
| Smoking                              | non smoker                           | 927                      | 94   | 172                 | 94   | ref                                       |                  |
|                                      | (ex-)smoker                          | 59                       | 6    | 11                  | 6    | 0.67                                      | 0.35-1.27        |
| Public transportation                | none                                 | 587                      | 59.6 | 109                 | 59.9 | ref                                       |                  |
|                                      | bus/train                            | 395                      | 40.1 | 71                  | 39.0 | 0.85                                      | 0.63-1.16        |
|                                      | moto taxi/shared taxi                | 3                        | 0.3  | 2                   | 1.1  | 1.95                                      | 0.47-8.07        |
| Sharing bedroom                      | 1-2 pers.                            | 805                      | 58.7 | 178                 | 63.6 | ref                                       |                  |
|                                      | 3 or more pers.                      | 566                      | 41.3 | 102                 | 36.4 | 0.84                                      | 0.66-1.08        |
| Sharing toilet with other household  |                                      | 214                      | 15.6 | 37                  | 13.2 | 0.80                                      | 0.57-1.13        |
| Handwash facility                    | sink/faucet                          | 511                      | 37.3 | 110                 | 39.3 | ref                                       |                  |
|                                      | bucket/jar/kettle                    | 267                      | 19.5 | 51                  | 18.2 | 1.11                                      | 0.80-1.55        |
|                                      | none                                 | 593                      | 43.3 | 119                 | 42.5 | 0.98                                      | 0.75-1.27        |
| Water available in house             | yes                                  | 581                      | 42.4 | 118                 | 42.1 | ref                                       |                  |
|                                      | no                                   | 790                      | 57.6 | 162                 | 57.9 | 1.08                                      | 0.85-1.37        |

214 \*in  $\geq 16$  year olds

## 215 Discussion

216 Population-based COVID-19 surveillance in an urban population cohort in Mozambique confirmed that  
 217 even during the acute phase of the pandemic the large majority of SARS-CoV-2 infections were  
 218 asymptomatic, (symptomatic) COVID-19 cases were mild, and three in four were non-febrile.

219 Three COVID-19 peaks were distinct and died out after a few weeks, while other respiratory illness  
220 (SARS-CoV-2 negative) continued to be reported throughout 2021. Sudden drops in COVID-19 incidence  
221 after peaks while respiratory pathogens other than SARS-CoV-2 continue to circulate, indicate that newly  
222 introduced COVID-19 variants (Alpha, Delta, Omikron) could quickly spread despite non-pharmaceutical  
223 interventions. Nonetheless, transmission slowed when infection-induced seroprevalence (e.g., 11.2% in  
224 March 2021) was still lower than the herd immunity threshold anticipated from the Alpha variants'  
225 reported transmissibility (13).

226 Surveillance started in December 2020 when the Beta variant had spread for 3 months through  
227 neighbouring South Africa, and two weeks before a surge in cases in Mozambique. Infection-induced  
228 seroprevalence of 4.8% in December 2020 was lower than the corrected pooled 16.2% reported in other  
229 African countries that month (5). Limited spread of wild type virus and the Beta variant during the first  
230 year of the pandemic – contrasting to neighbouring South Africa and Eswatini – could result from limited  
231 seeding through imported cases, limited mobility within the city and country, and longer maintained non-  
232 pharmaceutical interventions compared to its neighbours (14). The eventual surge in cases in January 2021  
233 followed relaxed non-pharmaceutical interventions for the end-of-year holidays coinciding with the  
234 presumed introduction of the Alpha variant with increased transmissibility (13).

235 SARS-CoV-2 sero-prevalence rose to 34.7% in June 2021, still far below the pooled 76% infection-  
236 induced seroprevalence reported in other African countries. Only a fraction of that difference in sero-  
237 prevalence can be explained by serological test specificity. Our analysis of SARS-CoV-2 sero-positivity  
238 comparing several SARS-CoV-2 antigen targets demonstrated a difference of up to 12%, thus cannot  
239 explain the twice higher sero-prevalence in other sero-surveys in sub-Saharan Africa. A diagnostic  
240 performance study of the serological immunofluorescence assay supported the use of RBD and NP for  
241 IgG detection (12). A study using the same assay however showed decreasing sero-prevalence as a result  
242 of waning NP-specific IgG after three months (15). This could explain the decreasing sero-prevalence  
243 observed in July 2021.

244 The observed effect of age, obesity, and chronic conditions on the risk of mild disease was similar to the  
245 effect on risk of severe disease or death reported elsewhere (1,16). While HIV and (history of)  
246 tuberculosis have - been associated with COVID-19-related death (8), we observed no increased risk of  
247 infection nor of disease. Also, deprivation, increasing the risk of infection, disease and severity in several  
248 settings (1,2,17), did not affect the risk of SARS-CoV-2 infection in this population of Maputo city.  
249 Several indicators of deprivation, such as belonging to the lowest wealth quintile, no education, absence of  
250 handwash facilities, were even associated with a lower risk of COVID-19.

251 Among cases of respiratory illness, only anosmia, ageusia, loss of appetite and chills increased the  
252 probability of COVID-19, yet none of those symptoms was reported by more than a third of cases and the  
253 association disappeared in cases from December 2021 onwards, presumably Omikron cases. Symptoms'  
254 poor predictive value, in combination with continued reporting of other respiratory illness, hampers  
255 diagnosis of mild/moderate COVID-19 on clinical grounds alone (18).

## 256 **Conclusion**

257 Active surveillance in an urban population cohort confirmed frequent COVID-19 underreporting, yet  
258 indicated that the large majority of cases were mild and non-febrile. In contrast to industrialised countries,  
259 deprivation did not increase the risk of infection nor disease.

260

## 261 **Transparency declaration**

262 All authors declare no competing interests. The work was funded by a European & Developing Countries  
263 Clinical Trials Partnership (EDCTP) project (RIA2020EF-3031). The funders had no role in study design,  
264 data collection and analysis, decision to publish, or preparation of the manuscript.

## 265 **Data availability**

266 Pseudonymized data supporting the findings of this study/publication are retained at the Institute of  
267 Tropical Medicine, Antwerp and can be made available after approval of a motivated and written request  
268 to [ITMresearchdataaccess@itg.be](mailto:ITMresearchdataaccess@itg.be). Study protocol, data dictionaries, scripts for conducting the analysis,  
269 and anonymized data, without geo-located or other data that could allow identification, are available on  
270 <https://github.com/ingelbeen/africover-git>.

## 271 **Acknowledgements**

272 We thank participants of the Polana Caniço Health and Demographic Surveillance System, interviewers,  
273 teams involved in laboratory testing of samples (Claudia Machume, Gercio Cuamba, Caro Van Geel), data  
274 management (Alberto Machaze, Eben Matavele, Harry van Loen), and study monitors (Dimpall Asmucrai,  
275 Carolien Hoof).

## 276 **References**

- 277 1. Williamson EJ, Walker AJ, Bhaskaran K, Bacon S, Bates C, Morton CE, et al. Factors associated  
278 with COVID-19-related death using OpenSAFELY. *Nature* [Internet]. 2020 Aug 20 [cited 2020  
279 Aug 17];584(7821):430–6. Available from: <https://www.nature.com/articles/s41586-020-2521-4>
- 280 2. Vandentorren S, Smaili S, Chatignoux E, Maurel M, Alleaume C, Neufcourt L, et al. The effect of  
281 social deprivation on the dynamic of SARS-CoV-2 infection in France: a population-based  
282 analysis. *Lancet Public Heal* [Internet]. 2022 Feb [cited 2022 Feb 24];7(3):e240–9. Available from:  
283 <http://www.thelancet.com/article/S246826672200007X/fulltext>
- 284 3. Mathur R, Rentsch CT, Morton CE, Hulme WJ, Schultze A, MacKenna B, et al. Ethnic differences  
285 in SARS-CoV-2 infection and COVID-19-related hospitalisation, intensive care unit admission,  
286 and death in 17 million adults in England: an observational cohort study using the OpenSAFELY  
287 platform. *Lancet* [Internet]. 2021 Apr 30 [cited 2021 May 10];397(10286):1711–24. Available  
288 from: <http://www.ncbi.nlm.nih.gov/pubmed/33939953>
- 289 4. Davies NG, Klepac P, Liu Y, Prem K, Jit M, Eggo RM. Age-dependent effects in the transmission  
290 and control of COVID-19 epidemics. *Nat Med* [Internet]. 2020 Jun 16 [cited 2020 Jun  
291 17];26:1205–11. Available from: <http://www.nature.com/articles/s41591-020-0962-9>
- 292 5. Bergeri I, Whelan MG, Ware H, Subissi L, Nardone A, Lewis HC, et al. Global SARS-CoV-2  
293 seroprevalence from January 2020 to April 2022: A systematic review and meta-analysis of  
294 standardized population-based studies. *PLoS Med* [Internet]. 2022 Nov 1 [cited 2023 Dec  
295 12];19(11). Available from: <https://pubmed.ncbi.nlm.nih.gov/36355774/>
- 296 6. Lewis HC, Ware H, Whelan M, Subissi L, Li Z, Ma X, et al. SARS-CoV-2 infection in Africa: A  
297 systematic review and meta-analysis of standardised seroprevalence studies, from January 2020 to  
298 December 2021. *BMJ Glob Heal*. 2022;7(8):1–15.
- 299 7. O’Driscoll M, Dos Santos GR, Wang L, Cummings DAT, Azman AS, Paireau J, et al. Age-  
300 specific mortality and immunity patterns of SARS-CoV-2. *Nature* [Internet]. 2020 Nov 2 [cited  
301 2020 Nov 18]; Available from: <http://www.ncbi.nlm.nih.gov/pubmed/33137809>
- 302 8. Boule A, Davies MA, Hussey H, Ismail M, Morden E, Vundle Z, et al. Risk Factors for  
303 Coronavirus Disease 2019 (COVID-19) Death in a Population Cohort Study from the Western  
304 Cape Province, South Africa. *Clin Infect Dis* [Internet]. 2021 Aug 29 [cited 2020 Oct  
305 8];73(7):E2005–15. Available from: <https://pubmed.ncbi.nlm.nih.gov/32860699/>
- 306 9. Laajaj R, Webb D, Aristizabal D, Behrentz E, Bernal R, Buitrago G, et al. Understanding how  
307 socioeconomic inequalities drive inequalities in COVID-19 infections. *Sci Rep* [Internet].  
308 2022;12(1). Available from: <https://doi.org/10.1038/s41598-022-11706-7>

- 309 10. Otiende M, Nyaguara A, Bottomley C, Walumbe D, Mochamah G, Amadi D, et al. Impact of  
310 COVID-19 on mortality in coastal Kenya: a longitudinal open cohort study. *Nat Commun* 2023  
311 141 [Internet]. 2023 Oct 28 [cited 2023 Dec 13];14(1):1–9. Available from:  
312 <https://www.nature.com/articles/s41467-023-42615-6>
- 313 11. Wang H, Paulson KR, Pease SA, Watson S, Comfort H, Zheng P, et al. Estimating excess  
314 mortality due to the COVID-19 pandemic: a systematic analysis of COVID-19-related mortality,  
315 2020–21. *Lancet* [Internet]. 2022 Apr 16 [cited 2023 Jun 22];399(10334):1513–36. Available  
316 from: <https://linkinghub.elsevier.com/retrieve/pii/S0140673621027963>
- 317 12. Mariën J, Ceulemans A, Michiels J, Heyndrickx L, Kerkhof K, Foque N, et al. Evaluating SARS-  
318 CoV-2 spike and nucleocapsid proteins as targets for antibody detection in severe and mild  
319 COVID-19 cases using a Luminex bead-based assay. *J Virol Methods* [Internet]. 2021 Feb 1 [cited  
320 2022 Jun 20];288. Available from: <https://pubmed.ncbi.nlm.nih.gov/33227340/>
- 321 13. Davies NG, Abbott S, Barnard RC, Jarvis CI, Kucharski AJ, Munday JD, et al. Estimated  
322 transmissibility and impact of SARS-CoV-2 lineage B.1.1.7 in England. *Science* (80- ) [Internet].  
323 2021 Apr 9 [cited 2023 Dec 14];372(6538). Available from:  
324 <https://www.science.org/doi/10.1126/science.abg3055>
- 325 14. Hale T, Angrist N, Goldszmidt R, Kira B, Petherick A, Phillips T, et al. A global panel database of  
326 pandemic policies (Oxford COVID-19 Government Response Tracker). *Nat Hum Behav* [Internet].  
327 2021;5(4):529–38. Available from: <http://dx.doi.org/10.1038/s41562-021-01079-8>
- 328 15. Mariën J, Ceulemans A, Bakokimi D, Lammens C, Ieven M, Heytens S, et al. Prospective SARS-  
329 CoV-2 cohort study among primary health care providers during the second COVID-19 wave in  
330 Flanders, Belgium. *Fam Pract* [Internet]. 2021 Aug 27 [cited 2021 Sep 1]; Available from:  
331 <https://academic.oup.com/fampra/advance-article/doi/10.1093/fampra/cmab094/6358549>
- 332 16. Docherty AB, Harrison EM, Green CA, Hardwick HE, Pius R, Norman L, et al. Features of 20 133  
333 UK patients in hospital with covid-19 using the ISARIC WHO Clinical Characterisation Protocol:  
334 prospective observational cohort study. *Br Med J* [Internet]. 2020 [cited 2020 May 28];369:m1985.  
335 Available from: <https://isaric4c.net>
- 336 17. Mena GE, Martinez PP, Mahmud AS, Marquet PA, Buckee CO, Santillana M. Socioeconomic  
337 status determines COVID-19 incidence and related mortality in Santiago, Chile. *Science* (80- ).  
338 2021;372(6545).
- 339 18. Wynants L, Van Calster B, Collins GS, Riley RD, Heinze G, Schuit E, et al. Prediction models for  
340 diagnosis and prognosis of covid-19: systematic review and critical appraisal. *BMJ* [Internet]. 2020  
341 Apr 7 [cited 2022 Jun 17];369. Available from: [/pmc/articles/PMC7222643/](https://pmc/articles/PMC7222643/)
- 342

343 **Appendix**

344 *Supplementary Table 1. Infection- and vaccine-induced SARS-CoV-2 seroprevalence based on detection*  
 345 *of antibodies against different SARS-CoV-2 antigens*

| month   | antibody detection         | RBP and NP positive |       |        | two out of RBD, NP and S1S2 positive |      |       | RBD positive (regardless of S1S2 and NP) |       |       |       |        |       |
|---------|----------------------------|---------------------|-------|--------|--------------------------------------|------|-------|------------------------------------------|-------|-------|-------|--------|-------|
|         |                            | n                   | prop  | 95%CI  | n                                    | prop | 95%CI | n                                        | prop  | 95%CI |       |        |       |
| 2020-12 | negative                   | 118                 | 0.952 | 0.914  | 0.989                                | 112  | 0.903 | 0.851                                    | 0.955 | 111   | 0.895 | 0.841  | 0.949 |
| 2020-12 | positive after infection   | 6                   | 0.048 | 0.011  | 0.086                                | 12   | 0.097 | 0.045                                    | 0.149 | 13    | 0.105 | 0.051  | 0.159 |
| 2021-01 | negative                   | 433                 | 0.945 | 0.925  | 0.966                                | 416  | 0.908 | 0.882                                    | 0.935 | 399   | 0.871 | 0.840  | 0.902 |
| 2021-01 | positive after infection   | 25                  | 0.055 | 0.034  | 0.075                                | 42   | 0.092 | 0.065                                    | 0.118 | 59    | 0.129 | 0.098  | 0.160 |
| 2021-02 | negative                   | 205                 | 0.911 | 0.874  | 0.948                                | 195  | 0.867 | 0.822                                    | 0.911 | 192   | 0.853 | 0.807  | 0.900 |
| 2021-02 | positive after infection   | 20                  | 0.089 | 0.052  | 0.126                                | 30   | 0.133 | 0.089                                    | 0.178 | 33    | 0.147 | 0.100  | 0.193 |
| 2021-03 | negative                   | 465                 | 0.884 | 0.857  | 0.911                                | 447  | 0.850 | 0.819                                    | 0.880 | 436   | 0.829 | 0.797  | 0.861 |
| 2021-03 | positive after infection   | 59                  | 0.112 | 0.085  | 0.139                                | 77   | 0.146 | 0.116                                    | 0.177 | 88    | 0.167 | 0.135  | 0.199 |
| 2021-03 | positive after vaccination | 2                   | 0.004 | -0.001 | 0.009                                | 2    | 0.004 | -0.001                                   | 0.009 | 2     | 0.004 | -0.001 | 0.009 |
| 2021-04 | negative                   | 244                 | 0.758 | 0.711  | 0.805                                | 238  | 0.739 | 0.691                                    | 0.787 | 212   | 0.658 | 0.607  | 0.710 |
| 2021-04 | positive after infection   | 75                  | 0.233 | 0.187  | 0.279                                | 81   | 0.252 | 0.204                                    | 0.299 | 107   | 0.332 | 0.281  | 0.384 |
| 2021-04 | positive after vaccination | 3                   | 0.009 | -0.001 | 0.020                                | 3    | 0.009 | -0.001                                   | 0.020 | 3     | 0.009 | -0.001 | 0.020 |
| 2021-05 | negative                   | 181                 | 0.733 | 0.678  | 0.788                                | 179  | 0.725 | 0.669                                    | 0.780 | 163   | 0.660 | 0.601  | 0.719 |
| 2021-05 | positive after infection   | 62                  | 0.251 | 0.197  | 0.305                                | 64   | 0.259 | 0.204                                    | 0.314 | 79    | 0.320 | 0.262  | 0.378 |
| 2021-05 | positive after vaccination | 4                   | 0.016 | 0.000  | 0.032                                | 4    | 0.016 | 0.000                                    | 0.032 | 5     | 0.020 | 0.003  | 0.038 |
| 2021-06 | negative                   | 48                  | 0.658 | 0.549  | 0.766                                | 46   | 0.630 | 0.519                                    | 0.741 | 42    | 0.575 | 0.462  | 0.689 |
| 2021-06 | positive after infection   | 23                  | 0.315 | 0.209  | 0.422                                | 25   | 0.342 | 0.234                                    | 0.451 | 29    | 0.397 | 0.285  | 0.510 |
| 2021-06 | positive after vaccination | 2                   | 0.027 | -0.010 | 0.065                                | 2    | 0.027 | -0.010                                   | 0.065 | 2     | 0.027 | -0.010 | 0.065 |
| 2021-07 | negative                   | 143                 | 0.665 | 0.602  | 0.728                                | 143  | 0.665 | 0.602                                    | 0.728 | 115   | 0.535 | 0.468  | 0.602 |
| 2021-07 | positive after infection   | 61                  | 0.284 | 0.223  | 0.344                                | 61   | 0.284 | 0.223                                    | 0.344 | 86    | 0.400 | 0.335  | 0.465 |
| 2021-07 | positive after vaccination | 11                  | 0.051 | 0.022  | 0.081                                | 11   | 0.051 | 0.022                                    | 0.081 | 14    | 0.065 | 0.032  | 0.098 |

346 RBD= receptor-binding domain (of the spike protein), NP=nucleocapsid protein, S1S2=spike glycoprotein S1 and S2 subunit
